# Supplementary material
Source: publisher site journal article supplement (https://www.spandidos-publications.com/7694/downloadSupplementary)
Supplement: Supplementary file 1 [file downloadSupplementary]

**Table S1.** Primer sequences for reverse transcription-quantitative PCR.

| <b>Gene</b>    | <b>NCBI gene ID</b> | <b>Sequence (5'-3')</b>     |
|----------------|---------------------|-----------------------------|
| <i>BCL2</i>    | 596                 | F: GGTGGGGTCATGTGTGTGG      |
|                |                     | R: CGG TTCAGG TACTCAGTCATCC |
| <i>BIRC3</i>   | 330                 | F: TTTCCGTGGCTCTTATTCAAAC T |
|                |                     | R: GCACAGTGGTAGGAACTTCTCAT  |
| <i>CAV2</i>    | 858                 | F: AAGACCTGCCTAATGGTTCTGC   |
|                |                     | R: CTCGTACACAATGGAGCAATGAT  |
| <i>CCNE2</i>   | 9134                | F: TCAAGACGAAGTAGCCGTTTAC   |
|                |                     | R: TGACATCCTGGGTAGTTTTCCCTC |
| <i>CDKN1A</i>  | 1026                | F: TGTCCGTCAGAACCCATGC      |
|                |                     | R: AAAGTCGAAGTTCCATCGCTC    |
| <i>CLDN4</i>   | 1364                | F: TGGGGCTACAGGTAATGGG      |
|                |                     | R: GGTCTGCGAGGTGACAATGTT    |
| <i>CTNNA2</i>  | 1496                | F: GGACGCTAACAGTGGA AAGG    |
|                |                     | R: GAGTGGCTTGCTCTACAGAGG    |
| <i>CTNNA3</i>  | 29119               | F: CTTGAGGAAGTTCGCAAAGAAAG  |
|                |                     | R: GCAAGAGGCACATGACATCAAT   |
| <i>CXCR1</i>   | 3577                | F: CTGACCCAGAAGCGTCACTTG    |
|                |                     | R: CCAGGACCTCATAGCAAAC T    |
| <i>CXCR3</i>   | 2833                | F: CCACCTAGCTGTAGCAGACAC    |
|                |                     | R: AGGGCTCCTGCGTAGAAGTT     |
| <i>CYP11A1</i> | 1543                | F: TCGCCACGGAGTTTCTTC       |
|                |                     | R: GGTCAGCATGTGCCCAATCA     |
| <i>CYP11B1</i> | 1545                | F: AAGTTCTTGAGGCACTGCGAA    |
|                |                     | R: GGCCGGTACGTTCTCAAAT      |
| <i>CYP7B1</i>  | 9420                | F: AAAACCACAAGTTGGGACACG    |
|                |                     | R: GAAGCTCAATGGGTATGTTGGAT  |
| <i>EFNA2</i>   | 1943                | F: TACGCCGTCTACTGGAACC      |
|                |                     | R: GAGCCTCGTACAGGGTCTC      |
| <i>ERBB3</i>   | 2065                | F: GACCCAGGTCTACGATGGGAA    |
|                |                     | R: GTGAGCTGAGTCAAGCGGAG     |

|                |        |                            |
|----------------|--------|----------------------------|
| <i>EXT1</i>    | 2131   | F: GCTCTTGTCTCGCCCTTTTGT   |
|                |        | R: GTGGTGCAAGCCATTCTAC     |
| <i>FHIT</i>    | 2272   | F: ATCTCATCAAGCCCTCTGTAGT  |
|                |        | R: GGACGCAGGTCATGGAAGC     |
| <i>GALNT10</i> | 55568  | F: TCAGCGCGTAGGAAATGGAG    |
|                |        | R: GGAGAGAGCGATTCAAGGAGA   |
| <i>GALNT18</i> | 374378 | F: GGGTCACCAACTACATCGCC    |
|                |        | R: CCGCTCAATAATCTTCAGAGTGT |
| <i>GAPDH</i>   | 2597   | F: GGAGCGAGATCCCTCCAAAAT   |
|                |        | R: GGCTGTTGTCATACTTCTCATGG |
| <i>GCNT4</i>   | 51301  | F: GTTGTGGCAATGACCAGTGAT   |
|                |        | R: AGCATGGATAAGCCTTTCAACC  |
| <i>GNG7</i>    | 2788   | F: TTGAGCGCATCAAGGTCTCC    |
|                |        | R: AAGGTTTCTTGTCTTAAAGGGG  |
| <i>HS6ST2</i>  | 90161  | F: TGCTCTTCTATTTGCCGTGA    |
|                |        | R: ATTGTAGCGGGGCACGAAC     |
| <i>HS6ST3</i>  | 266722 | F: TCCAGTGTACGTTACCTGAG    |
|                |        | R: TGTAGGTGCAATCCATAAACTCC |
| <i>IGF1R</i>   | 3480   | F: ATGCTGACCTCTGTTACCTCT   |
|                |        | R: GGCTTATTTCCCACAATGTAGTT |
| <i>IL2RB</i>   | 3560   | F: CAGCGGTGAATGGCACTTC     |
|                |        | R: GGCATGGACTTGGCAGGAA     |
| <i>IL2RG</i>   | 3561   | F: GTGCAGCCACTATCTATTCTCTG |
|                |        | R: GTGAAGTGTTAGGTTCTCTGGAG |
| <i>ITPR2</i>   | 3709   | F: CACCTTGGGGTTAGTGGATGA   |
|                |        | R: CTCGGTGTGGTTCCCTTGT     |
| <i>JAG1</i>    | 182    | F: GTCCATGCAGAACGTGAACG    |
|                |        | R: GCGGGACTGATACTCCTTGA    |
| <i>MMP16</i>   | 4325   | F: AGCACTGGAAGACGGTTGG     |
|                |        | R: CTCCGTTCCGCAGACTGTA     |
| <i>MYC</i>     | 4609   | F: GGCTCCTGGCAAAGGTCA      |
|                |        | R: CTGCGTAGTTGTGCTGATGT    |

|                   |        |                            |
|-------------------|--------|----------------------------|
| <i>NDST3</i>      | 9348   | F: ATACCGGAGGGGTTTTATCCA   |
|                   |        | R: GTTGAGGACGACAGTGAAGAA   |
| <i>NLRP1</i>      | 22861  | F: GCAGTGCTAATGCCCTGGAT    |
|                   |        | R: GAGCTTGGTAGAGGAGTGAGG   |
| <i>NLRP12</i>     | 91662  | F: ACCAGACCTTGACCGACCTT    |
|                   |        | R: GAGGACTCGGAGTTTGCAGC    |
| <i>PLCB1</i>      | 23236  | F: GCCTCGCCAGAAAAGGACAA    |
|                   |        | R: CATCTCAACAGAGGAGTTCCAG  |
| <i>PRKCA</i>      | 5578   | F: GTCCACAAGAGGTGCCATGAA   |
|                   |        | R: AAGGTGGGGCTTCCGTAAGT    |
| <i>PRKCB</i>      | 5579   | F: AGCCCCACGTTTTGTGACC     |
|                   |        | R: GCTGGGAACATTCATCACGC    |
| <i>PRKCQ</i>      | 5588   | F: ATGTCGCCATTTCTTCGGATT   |
|                   |        | R: ACATACTCTTTGACGAGCACAG  |
| <i>PTK2</i>       | 5747   | F: AGTGGACCAGGAAATTGCTTTG  |
|                   |        | R: GTGTTTTGTCCTTGACAGAATC  |
| <i>RAPGEF4</i>    | 11069  | F: CATGTGGCAAGTCCTGTTAGAA  |
|                   |        | R: CTCCTCCTCAGTAGGCAAAGG   |
| <i>SRD5A2</i>     | 6716   | F: ACTGCTCAATCGAGGGAGG     |
|                   |        | R: CACCCAAGCTAAACCGTATGTC  |
| <i>ST6GALNAC3</i> | 256435 | F: TGCTGGTTGTGCGTCTTGTA    |
|                   |        | R: GCCTGTATGTGTAGGAGAATGGT |
| <i>ST6GALNAC5</i> | 81849  | F: CACTGGACGGATACCTCGGA    |
|                   |        | R: TCTGTCTGGTCAATCTGGGAG   |
| <i>TRAF5</i>      | 7188   | F: AACTGCTGGAGGGTACTTGC    |
|                   |        | R: CTCTAGCACAGAGCCGGTAG    |
| <i>WNT3</i>       | 7473   | F: AGGGCACCTCCACCATTG      |
|                   |        | R: GACACTAACACGCCGAAGTCA   |
| <i>XCL1</i>       | 6375   | F: TGCTCTCTCACTGCATACATTG  |
|                   |        | R: TGGTGTAGGTCTTGATTCTGCT  |

NCBI, National Center for Biotechnology Information; F, forward; R, reverse.
